# Supplementary material for: Postcranial skeletal anatomy of the holotype and referred specimens of Buitreraptor gonzalezorum Makovicky, Apesteguía and Agnolín 2005 (Theropoda, Dromaeosauridae), from the Late Cretaceous of Patagonia
Source: PeerJ. 2018 Mar 26;6:e4558. doi: 10.7717/peerj.4558 (PMC5875404; doi:10.7717/peerj.4558)
Supplement: Supplemental Information 2 [file peerj-06-4558-s002.xlsx]

## Sheet: Hoja1
Selected measurements of the postcranial bones of Buitreraptor gonzalezorum (in mm)
Holotype (MPCA 245)				MPCA 238			MPCA 478
Bone	Length	Transversal width		Bone	Length		Bone	Length
right scapula*	94.96			right pubis*	90.58		right pedal phalanx II-1	19.76
right humerus	134.92			metatarsus*	100.61		right pedal phalanx II-2	14.97
right radius*	95.31			metatarsal I*	12.51		right pedal phalanx II-3*	15.6
right ulna*	107.92			metatarsal II*	89.85
right illium*	79.16			metatarsal III*	88.93
right ischium	51.98†			metatarsal IV*	89.83
right femur*	140.18			mediolateral width of metatarsus at midshaft	12.92
left femur*	144.91			distal width of metatarsus‡	20.72
right pedal phalanx II-1	22.43			right tibia + proximal tarsals*	94.63
right pedal phalanx II-2	18.13			right pedal phalanx I-1	14.67
right tibia*	148.8			right pedal phalanx II-2	19.02
axis*	23.81
6° cervical vertebra (neural arch)	35.51
9°cervical vertebra (neural arch)	25.17
10° cervical vertebra (neural arch)	22.37
1° dorsal vertebra (centrum)	17.13	5.52a
2° dorsal vertebra (centrum)	14.41	6.48p
3° dorsal vertebra (centrum)	14.1	6.47a
4° dorsal vertebra (centrum)	15.65	9.00p
5° dorsal vertebra (centrum)	15.72	10.37a
6° dorsal vertebra (centrum)	15.22	10.59p
7° dorsal vertebra (centrum)	15.79	11.06a
8° dorsal vertebra (centrum)	15.33	10.37a
9° dorsal vertebra (centrum)	15.85	10.56a
10° dorsal vertebra (centrum)	14.44	11.95p
11° dorsal vertebra (centrum)	14.4	11.26a
12° dorsal vertebra (centrum)	13.17	11.75a
13° dorsal vertebra (centrum)	14.23	11.64a
1° caudal vertebra (centrum)	11.69	10.40a
2° caudal vertebra (centrum)	12.96	9.41a
3° caudal vertebra (centrum)	14.16	8.65a
7° caudal vertebra (centrum)	18.25	6.33a
8° caudal vertebra (centrum)	22.23	7.24a
9° caudal vertebra (centrum)	27.27	7.09a
10° caudal vertebra (centrum)	31.69
* incomplete material
† from the iliac peduncle to the posterodistal end
a anterior articular surface
p posterior articular surface
‡ from the medial surface of MT II condyle to the lateral surface of the MT IV condyle
